# Supplementary material for: Isocitrate Dehydrogenase 1 Is a Novel Plasma Biomarker for the Diagnosis of Non–Small Cell Lung Cancer
Source: Oxford University Press journal article supplement (doi:10.1158/1078-0432.ccr-13-0046), 2013-09-15
Supplement: 10780432ccr130046-sup-107208_3_supp_2028254_mty185.docx [file 10780432ccr130046-sup-107208_3_supp_2028254_mty185.docx]

Figure S1. IDH1 concentrations in patients with different T stages.

(A) IDH1 concentrations in ADC patients with stages T1a-T2a versus stages T2b-T4.

(B) IDH1 concentrations in SCC patients with stages T1a-T2a versus stages T2b-T4. The black horizontal lines are median values. *P* values were determined by the Mann-Whitney U test .

Abbreviations: IDH1: isocitrate dehydrogenase 1; Controls: healthy controls; ADC: lung adenocarcinoma; SCC: lung squamous cell carcinoma.
