# Supplementary material for: Isocitrate Dehydrogenase 1 Is a Novel Plasma Biomarker for the Diagnosis of Non–Small Cell Lung Cancer
Source: Oxford University Press journal article supplement (doi:10.1158/1078-0432.ccr-13-0046), 2013-09-15
Supplement: 10780432ccr130046-sup-107208_3_supp_2028258_mgy185.docx [file 10780432ccr130046-sup-107208_3_supp_2028258_mgy185.docx]

Table S1. The equations used in the models, which were obtained by binary logistic regression.

|  | Equation |
| --- | --- |
| ADC |  |
| SCC |  |
| NSCLC |  |

Abbreviations: *x1*: isocitrate dehydrogenase 1; *x2*: CEA; *x3*: CA125; *x4*: Cyfra21-1; ADC: lung adenocarcinoma; SCC: lung squamous cell carcinoma; NSCLC: non-small cell lung cancer.
