# Supplementary material for: Isocitrate Dehydrogenase 1 Is a Novel Plasma Biomarker for the Diagnosis of Non–Small Cell Lung Cancer
Source: Oxford University Press journal article supplement (doi:10.1158/1078-0432.ccr-13-0046), 2013-09-15
Supplement: 10780432ccr130046-sup-107208_3_supp_2028259_mdy185.docx [file 10780432ccr130046-sup-107208_3_supp_2028259_mdy185.docx]

Table S2. The analysis of the Pearson Correlation between IDH1 levels and smoking history in ADC, SCC, and healthy control groups.

|  | IDH1 | |  | CEA | |  | CA125 | |  | Cyfra21-1 | |
| --- | --- | --- | --- | --- | --- | --- | --- | --- | --- | --- | --- |
| Sig. | Correlation coefficient | Sig. | Correlation coefficient | Sig. | Correlation coefficient | Sig. | Correlation coefficient |
| ADC | 0.796 | 0.012 |  | 0.458 | -0.035 |  | 0.172 | 0.064 |  | 0.333 | 0.046 |
| SCC | 0.996 | <0.001 |  | 0.731 | -0.016 |  | 0.285 | 0.049 |  | 0.648 | 0.021 |
| Controls | 0.685 | 0.019 |  | 0.379 | 0.040 |  | 0.059 | -0.086 |  | 0.828 | -0.010 |

Abbreviations: ADC: lung adenocarcinoma; SCC: lung squamous cell carcinoma; Controls: healthy controls; IDH1: isocitrate dehydrogenase 1
