# Supplementary material for: Isocitrate Dehydrogenase 1 Is a Novel Plasma Biomarker for the Diagnosis of Non–Small Cell Lung Cancer
Source: Oxford University Press journal article supplement (doi:10.1158/1078-0432.ccr-13-0046), 2013-09-15
Supplement: 10780432ccr130046-sup-107208_3_supp_2028260_mly185.docx [file 10780432ccr130046-sup-107208_3_supp_2028260_mly185.docx]

Table S3. The diagnostic effect of IDH1 after stratification in smokers and non-smokers.

|  | Smoking history | AUC | SE | Sig. | *P** value |
| --- | --- | --- | --- | --- | --- |
| ADC VS Controls | Non-smokers | 0.880 | 0.018 | <0.001 | 0.31 |
| Smokers | 0.897 | 0.027 | <0.001 |
| SCC VS Controls | Non-smokers | 0.889 | 0.041 | <0.001 | 0.21 |
| Smokers | 0.898 | 0.022 | <0.001 |
| NSCLC VS Controls | Non-smokers | 0.879 | 0.018 | <0.001 | 0.26 |
| Smokers | 0.890 | 0.022 | <0.001 |

*P**value: comparison of the ROC curves obtained from the different observing groups (non-smokers and smokers)

Abbreviations: ADC: lung adenocarcinoma; SCC: lung squamous cell carcinoma; NSCLC: non-small cell lung cancer; Controls: healthy controls; AUC: area under the curve.
